# Supplementary material for: Identification of an 8-miRNA signature as a potential prognostic biomarker for glioma
Source: PeerJ journal article supplement (doi:10.7717/peerj.9943), 2020-09-28

riskScore (p=1.208e-10)

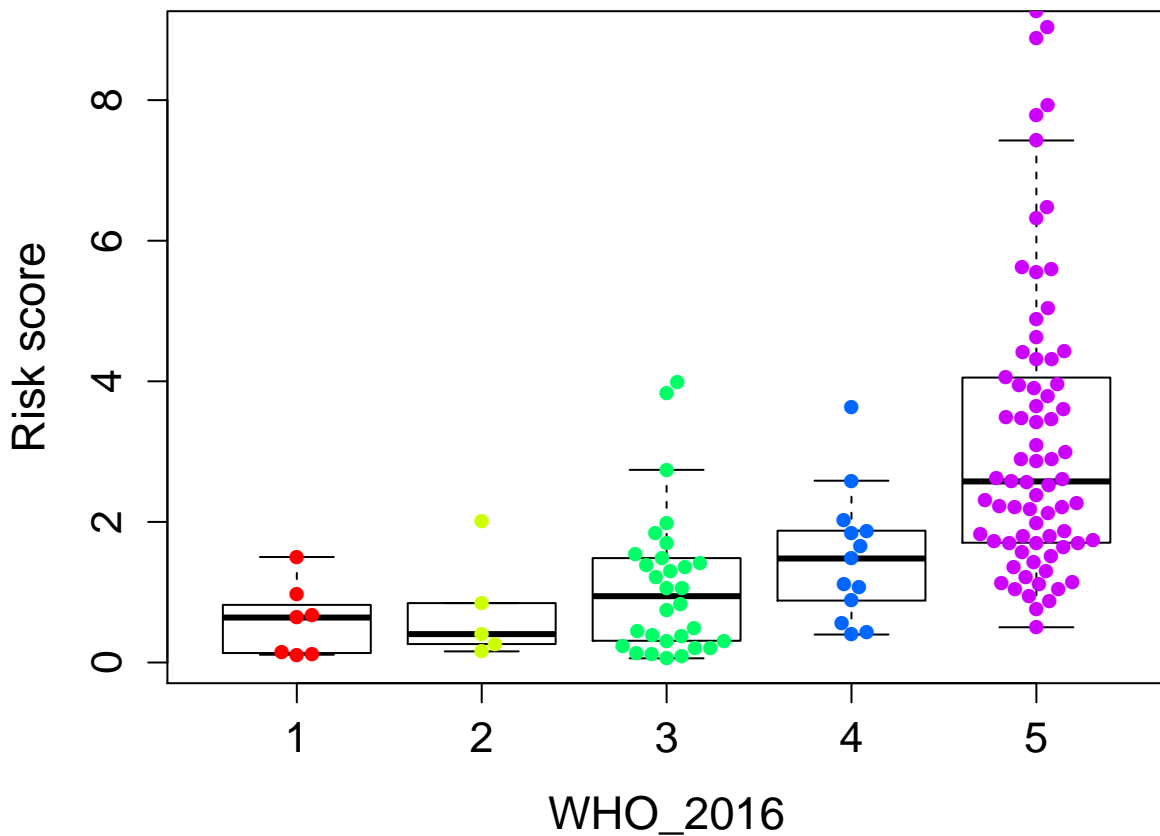

Supplement: Figure_S2.pdf [file Figure_S2.pdf]
