# Supplementary material for: Identification of an 8-miRNA signature as a potential prognostic biomarker for glioma
Source: PeerJ journal article supplement (doi:10.7717/peerj.9943), 2020-09-28

miR-148a (P=1.436e-15)

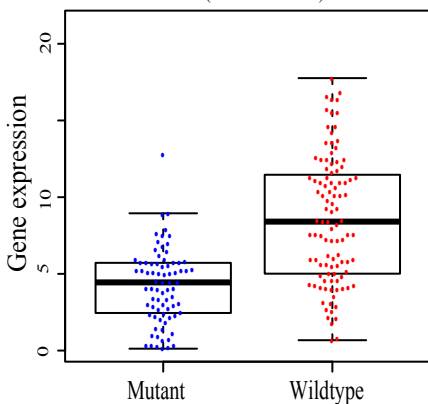

miR-196a (P=5.302e-09)

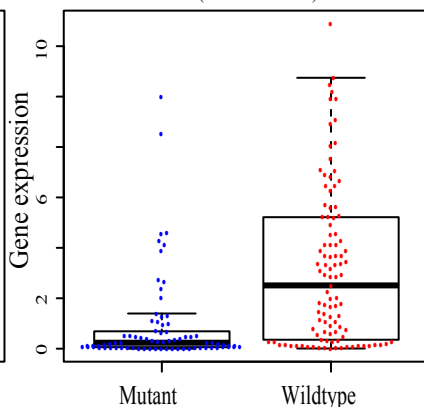

miR-645 (P=0.025)

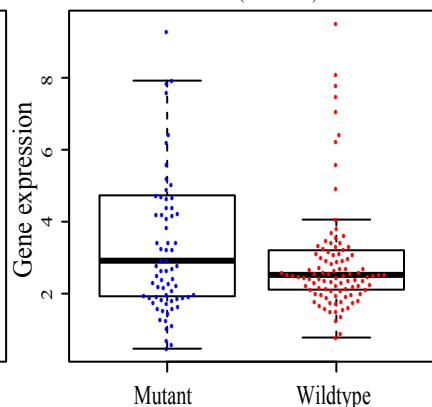

miR-1246 (P=2.553e-08)

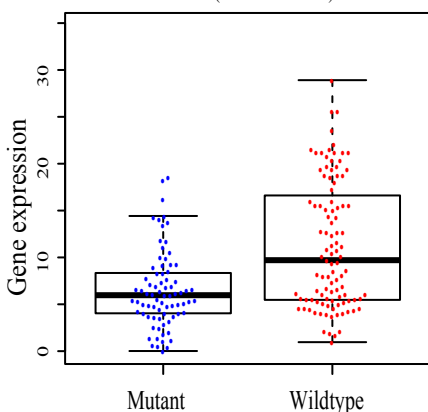

miR-338-3p (P=2.176e-04)

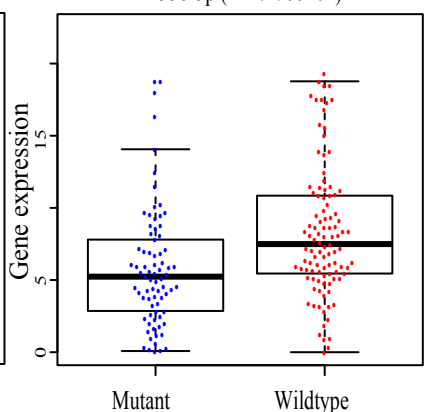

miR-342-5p (P=3.995e-06)

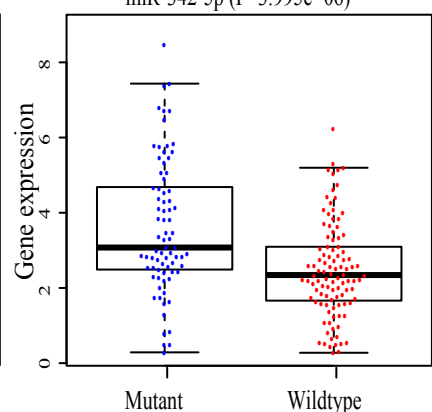

Supplement: Figure_S3.pdf [file Figure_S3.pdf]
