# Supplementary material for: Identification of an 8-miRNA signature as a potential prognostic biomarker for glioma
Source: PeerJ journal article supplement (doi:10.7717/peerj.9943), 2020-09-28

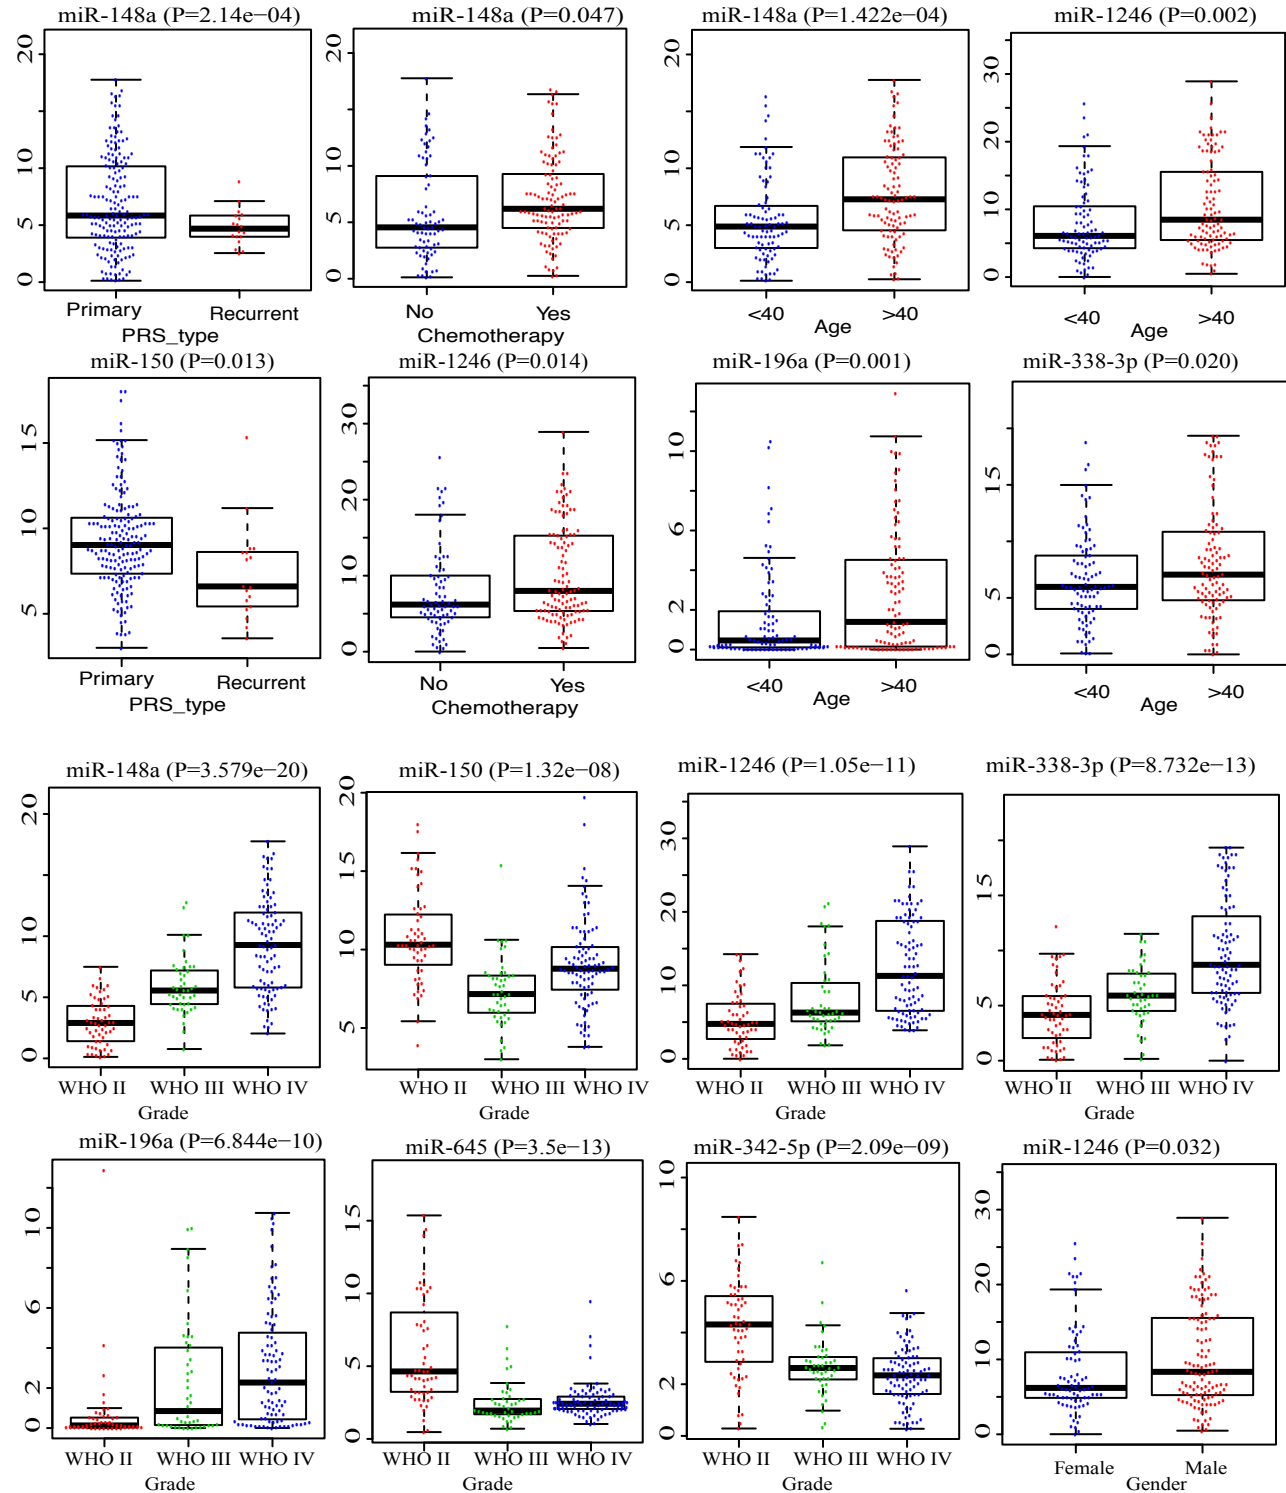

Supplement: Figure_S4.pdf [file Figure_S4.pdf]
